# Supplementary material for: Increased CO2 Fixation Enables High Carbon-Yield Production of the Acrylic Acid Precursor 3-Hydroxypropionic Acid in Yeast
Source: Research Square preprint supplement (doi:10.21203/rs.3.rs-3278694/v1), 2023-09-15
Supplement: Supplementary file 1 [file 1444c5154b31d809513bea21.xlsx]

## Sheet: genotype
Strain	Description	Resource
CEN.PK 113-11C	MATa SUC2 MAL2-8c his3Δ1 ura3-52	(van Dijken et al., 2000）
QLW1	XI2::(PGK1p-MCRN-FBA1t-TEF1p-MCRC***-CYC1t), ACC1p::TEF1p	This study
QLW2	XI2::(PGK1p-MCRN-FBA1t-TEF1p-MCRC***-CYC1t), ACC1p::TEF1p, XI3::(TDH3p-xPK-ADH1t-TEF1p-PTA-PGK1t）	This study
QLW3	XI2::(PGK1p-MCRN-FBA1t-TEF1p-MCRC***-CYC1t), ACC1p::TEF1p-ACC1**, XI3::(TDH3p-xPK-ADH1t-TEF1p-PTA-PGK1t）	This study
QLW4	XI2::(PGK1p-MCRN-FBA1t-TEF1p-MCRC***-CYC1t), ACC1p::TEF1p-ACC1**, XI3::(TDH3p-xPK-ADH1t-TEF1p-PTA-PGK1t）,STB5p::TEF1p	This study
QLW5	XI2::(PGK1p-MCRN-FBA1t-TEF1p-MCRC***-CYC1t), ACC1p::TEF1p-ACC1**, XI3::(TDH3p-xPK-ADH1t-TEF1p-PTA-PGK1t）,STB5p::ARTp	This study
QLW6	XI2::(PGK1p-MCRN-FBA1t-TEF1p-MCRC***-CYC1t), ACC1p::TEF1p-ACC1**, XI3::(TDH3p-xPK-ADH1t-TEF1p-PTA-PGK1t）,NCE103p::CCW12p	This study
QLW7	XI2::(PGK1p-MCRN-FBA1t-TEF1p-MCRC***-CYC1t), ACC1p::TEF1p-ACC1**, XI3::(TDH3p-xPK-ADH1t-TEF1p-PTA-PGK1t）,bor1Δ	This study
QLW8	XI2::(PGK1p-MCRN-FBA1t-TEF1p-MCRC***-CYC1t), ACC1p::TEF1p-ACC1**, XI3::(TDH3p-xPK-ADH1t-TEF1p-PTA-PGK1t）,SUL1p::PGK1p	This study
QLW9	XI2::(PGK1p-MCRN-FBA1t-TEF1p-MCRC***-CYC1t), ACC1p::TEF1p-ACC1**, XI3::(TDH3p-xPK-ADH1t-TEF1p-PTA-PGK1t）,SUL2p::FBA1p	This study
QLW10	XI2::(PGK1p-MCRN-FBA1t-TEF1p-MCRC***-CYC1t), ACC1p::TEF1p-ACC1**, XI3::(TDH3p-xPK-ADH1t-TEF1p-PTA-PGK1t）,STB5p::ARTp,SUL1p::PGK1p	This study
QLW11	XI2::(PGK1p-MCRN-FBA1t-TEF1p-MCRC***-CYC1t), ACC1p::TEF1p-ACC1**, XI3::(TDH3p-xPK-ADH1t-TEF1p-PTA-PGK1t）,STB5p::ARTp,SUL1p::PGK1p,cit2Δ	This study
QLW12	XI2::(PGK1p-MCRN-FBA1t-TEF1p-MCRC***-CYC1t), ACC1p::TEF1p-ACC1**, XI3::(TDH3p-xPK-ADH1t-TEF1p-PTA-PGK1t）,STB5p::ARTp,SUL1p::PGK1p,CIT1p::CIT2p	This study
QLW13	XI2::(PGK1p-MCRN-FBA1t-TEF1p-MCRC***-CYC1t), ACC1p::TEF1p-ACC1**, XI3::(TDH3p-xPK-ADH1t-TEF1p-PTA-PGK1t）,STB5p::ARTp,SUL1p::PGK1p,CIT1*	This study
QLW14	XI2::(PGK1p-MCRN-FBA1t-TEF1p-MCRC***-CYC1t), ACC1p::TEF1p-ACC1**, XI3::(TDH3p-xPK-ADH1t-TEF1p-PTA-PGK1t）,STB5p::ARTp,SUL1p::PGK1p,PTC6p::CWP2p	This study
QLW15	XI2::(PGK1p-MCRN-FBA1t-TEF1p-MCRC***-CYC1t), ACC1p::TEF1p-ACC1**, XI3::(TDH3p-xPK-ADH1t-TEF1p-PTA-PGK1t）,STB5p::ARTp,SUL1p::PGK1p,PTC7p::CWP2p	This study
QLW16	XI2::(PGK1p-MCRN-FBA1t-TEF1p-MCRC***-CYC1t), ACC1p::TEF1p-ACC1**, XI3::(TDH3p-xPK-ADH1t-TEF1p-PTA-PGK1t）,STB5p::ARTp,SUL1p::PGK1p,PTC7p::CWP2p,CIT1*	This study
QLW17	XI2::(PGK1p-MCRN-FBA1t-TEF1p-MCRC***-CYC1t), ACC1p::TEF1p-ACC1**, XI3::(TDH3p-xPK-ADH1t-TEF1p-PTA-PGK1t）,STB5p::ARTp,SUL1p::PGK1p,PTC7p::CWP2p,CIT1p::CIT2p	This study
QLW18	XI2::(PGK1p-MCRN-FBA1t-TEF1p-MCRC***-CYC1t), ACC1p::TEF1p-ACC1**, XI3::(TDH3p-xPK-ADH1t-TEF1p-PTA-PGK1t）,STB5p::ARTp,SUL1p::PGK1p,PTC7p::CWP2p,CIT1p::CIT2p,CIT1*	This study
QLW19	XI2::(PGK1p-MCRN-FBA1t-TEF1p-MCRC***-CYC1t), ACC1p::TEF1p-ACC1**, XI3::(TDH3p-xPK-ADH1t-TEF1p-PTA-PGK1t）,STB5p::ARTp,SUL1p::PGK1p,PTC7p::CWP2p,CIT1p::CIT2p,CIT1*,YHM2p::CWP2p ,IDP2p::CCW12p	This study
QLW20	XI2::(PGK1p-MCRN-FBA1t), ACC1p::TEF1p-ACC1**, XI3::(TDH3p-xPK-ADH1t-TEF1p-PTA-PGK1t）,STB5p::ARTp,SUL1p::PGK1p,PTC7p::CWP2p,CIT1p::CIT2p,CIT1*,YHM2p::CWP2p ,IDP2p::CCW12p,pNLW1	This study
QLW21	XI2::(PGK1p-MCRN-FBA1t), ACC1p::TEF1p-ACC1**, XI3::(TDH3p-xPK-ADH1t-TEF1p-PTA-PGK1t）,STB5p::ARTp,SUL1p::PGK1p,PTC7p::CWP2p,CIT1p::CIT2p,CIT1*,YHM2p::CWP2p ,IDP2p::CCW12p,pNLW2	This study
QLW22	XI3::(TDH3p-xPK-ADH1t-TEF1p-PTA-PGK1t）,STB5p::ARTp,SUL1p::PGK1p,PTC7p::CWP2p,CIT1p::CIT2p-CIT1*,YHM2p::CWP2p ,IDP2p::CCW12p,pNLW3	This study
QLW23	XI3::(TDH3p-xPK-ADH1t-TEF1p-PTA-PGK1t）,STB5p::ARTp,SUL1p::PGK1p,PTC7p::CWP2p,CIT1p::CIT2p-CIT1*,YHM2p::CWP2p ,IDP2p::CCW12p,pNLW4	This study
QLW24	XI3::(TDH3p-xPK-ADH1t-TEF1p-PTA-PGK1t）,STB5p::ARTp,SUL1p::PGK1p,PTC7p::CWP2p,CIT1p::CIT2p-CIT1*,YHM2p::CWP2p ,IDP2p::CCW12p,pNLW5	This study
QLW25	XI3::(TDH3p-xPK-ADH1t-TEF1p-PTA-PGK1t）,STB5p::ARTp,SUL1p::PGK1p,PTC7p::CWP2p,CIT1p::CIT2p-CIT1*,YHM2p::CWP2p ,IDP2p::CCW12p,pNLW6	This study
QLW26	XI3::(TDH3p-xPK-ADH1t-TEF1p-PTA-PGK1t）,STB5p::ARTp,SUL1p::PGK1p,PTC7p::CWP2p,CIT1p::CIT2p-CIT1*,YHM2p::CWP2p ,IDP2p::CCW12p,pNLW7	This study
QLW27	XI3::(TDH3p-xPK-ADH1t-TEF1p-PTA-PGK1t）,STB5p::ARTp,SUL1p::PGK1p,PTC7p::CWP2p,CIT1p::CIT2p-CIT1*,YHM2p::CWP2p ,IDP2p::CCW12p,pNLW8	This study
QLW28	XI3::(TDH3p-xPK-ADH1t-TEF1p-PTA-PGK1t）,STB5p::ARTp,SUL1p::PGK1p,PTC7p::CWP2p,CIT1p::CIT2p-CIT1*,YHM2p::CWP2p ,IDP2p::CCW12p,pNLW9	This study
QLW29	XI3::(TDH3p-xPK-ADH1t-TEF1p-PTA-PGK1t）,STB5p::ARTp,SUL1p::PGK1p,PTC7p::CWP2p,CIT1p::CIT2p-CIT1*,YHM2p::CWP2p ,IDP2p::CCW12p,pNLW10	This study
QLW30	XI2::(PGK1p-MCRN-FBA1t-TEF1p-MCRC***-CYC1t), XI3::(TDH3p-xPK-ADH1t-TEF1p-PTA-PGK1t）,STB5p::ARTp,SUL1p::PGK1p,PTC7p::CWP2p,CIT1p::CIT2p-CIT1*,YHM2p::CWP2p ,IDP2p::CCW12p,FAS1p::HXT1p,pNLW7	This study
QLW31	XI2::(PGK1p-MCRN-FBA1t-TEF1p-MCRC***-CYC1t), XI3::(TDH3p-xPK-ADH1t-TEF1p-PTA-PGK1t）,STB5p::ARTp,SUL1p::PGK1p,PTC7p::CWP2p,CIT1p::CIT2p,CIT1*,YHM2p::CWP2p ,IDP2p::CCW12p,FAS1p::COX9p,pNLW7	This study
QLW32	XI2::(PGK1p-MCRN-FBA1t-TEF1p-MCRC***-CYC1t), XI3::(TDH3p-xPK-ADH1t-TEF1p-PTA-PGK1t）,STB5p::ARTp,SUL1p::PGK1p,PTC7p::CWP2p,CIT1p::CIT2p-CIT1*,YHM2p::CWP2p ,IDP2p::CCW12p,POX1p::RDP3Lp,pNLW7	This study
QLW33	XI2::(PGK1p-MCRN-FBA1t-TEF1p-MCRC***-CYC1t), XI3::(TDH3p-xPK-ADH1t-TEF1p-PTA-PGK1t）,STB5p::ARTp,SUL1p::PGK1p,PTC7p::CWP2p,CIT1p::CIT2p-CIT1*,YHM2p::CWP2p ,IDP2p::CCW12p,POX1p::CCW12p,pNLW7	This study
QLW34	XI2::(PGK1p-MCRN-FBA1t-TEF1p-MCRC***-CYC1t), XI3::(TDH3p-xPK-ADH1t-TEF1p-PTA-PGK1t）,STB5p::ARTp,SUL1p::PGK1p,PTC7p::CWP2p,CIT1p::CIT2p-CIT1*,YHM2p::CWP2p ,IDP2p::CCW12p,POX2p::PGK1p,pNLW7	This study
QLW35	XI2::(PGK1p-MCRN-FBA1t-TEF1p-MCRC***-CYC1t), XI3::(TDH3p-xPK-ADH1t-TEF1p-PTA-PGK1t）,STB5p::ARTp,SUL1p::PGK1p,PTC7p::CWP2p,CIT1p::CIT2p-CIT1*,YHM2p::CWP2p ,IDP2p::CCW12p,FAS1p::HXT1p,POX1p::RDP3Lp, POX2p::PGK1p,pNLW7	This study
QLW36	XI2::(PGK1p-MCRN-FBA1t-TEF1p-MCRC***-CYC1t), XI3::(TDH3p-xPK-ADH1t-TEF1p-PTA-PGK1t）,STB5p::ARTp,SUL1p::PGK1p,PTC7p::CWP2p,CIT1p::CIT2p-CIT1*,YHM2p::CWP2p ,IDP2p::CCW12p,FAS1p::HXT1p,POX1p::CCW12p, POX2p::PGK1p,pNLW7	This study
QLW37	XI2::(PGK1p-MCRN-FBA1t-TEF1p-MCRC***-CYC1t), XI3::(TDH3p-xPK-ADH1t-TEF1p-PTA-PGK1t）,STB5p::ARTp,SUL1p::PGK1p,PTC7p::CWP2p,CIT1p::CIT2p-CIT1*,YHM2p::CWP2p ,IDP2p::CCW12p,FAS1p::HXT1p,POX1p::CCW12p, POX2p::PGK1p,SFA1C276S,pNLW7	This study
QLW38	XI2::(PGK1p-MCRN-FBA1t-TEF1p-MCRC***-CYC1t), XI3::(TDH3p-xPK-ADH1t-TEF1p-PTA-PGK1t）,STB5p::ARTp,SUL1p::PGK1p,PTC7p::CWP2p,CIT1p::CIT2p-CIT1*,YHM2p::CWP2p ,IDP2p::CCW12p,FAS1p::HXT1p,POX1p::CCW12p, POX2p::PGK1p,TRK1A1169E,pNLW7	This study
QLW39	XI2::(PGK1p-MCRN-FBA1t-TEF1p-MCRC***-CYC1t), XI3::(TDH3p-xPK-ADH1t-TEF1p-PTA-PGK1t）,STB5p::ARTp,SUL1p::PGK1p,PTC7p::CWP2p,CIT1p::CIT2p-CIT1*,YHM2p::CWP2p ,IDP2p::CCW12p,FAS1p::HXT1p,POX1p::CCW12p, POX2p::PGK1p,ssb1Δ,pNLW7	This study
QLW40	XI2::(PGK1p-MCRN-FBA1t-TEF1p-MCRC***-CYC1t), XI3::(TDH3p-xPK-ADH1t-TEF1p-PTA-PGK1t）,STB5p::ARTp,SUL1p::PGK1p,PTC7p::CWP2p,CIT1p::CIT2p-CIT1*,YHM2p::CWP2p ,IDP2p::CCW12p,FAS1p::HXT1p,POX1p::CCW12p, POX2p::PGK1p,gsf2Δ,pNLW7	This study
QLW41	XI2::(PGK1p-MCRN-FBA1t-TEF1p-MCRC***-CYC1t), XI3::(TDH3p-xPK-ADH1t-TEF1p-PTA-PGK1t）,STB5p::ARTp,SUL1p::PGK1p,PTC7p::CWP2p,CIT1p::CIT2p,CIT1*,YHM2p::CWP2p ,IDP2p::CCW12p,FAS1p::HXT1p,POX1p::CCW12p, POX2p::PGK1p,erf2Δ,pNLW7	This study
QLW42	XI2::(PGK1p-MCRN-FBA1t-TEF1p-MCRC***-CYC1t), XI3::(TDH3p-xPK-ADH1t-TEF1p-PTA-PGK1t）,STB5p::ARTp,SUL1p::PGK1p,PTC7p::CWP2p,CIT1p::CIT2p-CIT1*,YHM2p::CWP2p ,IDP2p::CCW12p,FAS1p::HXT1p,POX1p::CCW12p, POX2p::PGK1p,sam2Δ,pNLW7	This study
QLW43	XI2::(PGK1p-MCRN-FBA1t-TEF1p-MCRC***-CYC1t), XI3::(TDH3p-xPK-ADH1t-TEF1p-PTA-PGK1t）,STB5p::ARTp,SUL1p::PGK1p,PTC7p::CWP2p,CIT1p::CIT2p-CIT1*,YHM2p::CWP2p ,IDP2p::CCW12p,FAS1p::HXT1p,POX1p::CCW12p, POX2p::PGK1p,SUR1p::TEF1p,pNLW7	This study
QLW44	XI2::(PGK1p-MCRN-FBA1t-TEF1p-MCRC***-CYC1t), XI3::(TDH3p-xPK-ADH1t-TEF1p-PTA-PGK1t）,STB5p::ARTp,SUL1p::PGK1p,PTC7p::CWP2p,CIT1p::CIT2p-CIT1*,YHM2p::CWP2p ,IDP2p::CCW12p,FAS1p::HXT1p,POX1p::CCW12p, POX2p::PGK1p,PDR12p::TEF1p,pNLW7	This study
QLW45	XI2::(PGK1p-MCRN-FBA1t-TEF1p-MCRC***-CYC1t), XI3::(TDH3p-xPK-ADH1t-TEF1p-PTA-PGK1t）,STB5p::ARTp,SUL1p::PGK1p,PTC7p::CWP2p,CIT1p::CIT2p-CIT1*,YHM2p::CWP2p ,IDP2p::CCW12p,FAS1p::HXT1p,POX1p::CCW12p, POX2p::PGK1p,PMA1p::TEF1p,pNLW7	This study
QLW46	XI2::(PGK1p-MCRN-FBA1t-TEF1p-MCRC***-CYC1t), XI3::(TDH3p-xPK-ADH1t-TEF1p-PTA-PGK1t）,STB5p::ARTp,SUL1p::PGK1p,PTC7p::CWP2p,CIT1p::CIT2p-CIT1*,YHM2p::CWP2p ,IDP2p::CCW12p,FAS1p::HXT1p,POX1p::CCW12p, POX2p::PGK1p,ESBP6p::CWP2p,pNLW7	This study
QLW47	XI2::(PGK1p-MCRN-FBA1t-TEF1p-MCRC***-CYC1t), XI3::(TDH3p-xPK-ADH1t-TEF1p-PTA-PGK1t）,STB5p::ARTp,SUL1p::PGK1p,PTC7p::CWP2p,CIT1p::CIT2p-CIT1*,YHM2p::CWP2p ,IDP2p::CCW12p,FAS1p::HXT1p,POX1p::CCW12p, POX2p::PGK1p, jen1Δ,pNLW7	This study
QLW48	XI2::(PGK1p-MCRN-FBA1t-TEF1p-MCRC***-CYC1t), XI3::(TDH3p-xPK-ADH1t-TEF1p-PTA-PGK1t）,STB5p::ARTp,SUL1p::PGK1p,PTC7p::CWP2p,CIT1p::CIT2p-CIT1*,YHM2p::CWP2p ,IDP2p::CCW12p,FAS1p::HXT1p,POX1p::CCW12p, POX2p::PGK1p,gsf2Δ,erf2Δ,pNLW7	This study
QLW49	XI2::(PGK1p-MCRN-FBA1t-TEF1p-MCRC***-CYC1t), XI3::(TDH3p-xPK-ADH1t-TEF1p-PTA-PGK1t）,STB5p::ARTp,SUL1p::PGK1p,PTC7p::CWP2p,CIT1p::CIT2p-CIT1*,YHM2p::CWP2p ,IDP2p::CCW12p,FAS1p::HXT1p,POX1p::CCW12p, POX2p::PGK1p,gsf2Δ,sam2Δ,pNLW7	This study
QLW50	XI2::(PGK1p-MCRN-FBA1t-TEF1p-MCRC***-CYC1t), XI3::(TDH3p-xPK-ADH1t-TEF1p-PTA-PGK1t）,STB5p::ARTp,SUL1p::PGK1p,PTC7p::CWP2p,CIT1p::CIT2p-CIT1*,YHM2p::CWP2p ,IDP2p::CCW12p,FAS1p::HXT1p,POX1p::CCW12p, POX2p::PGK1p,gsf2Δ,ESBP6p::CWP2p,pNLW7	This study
QLW51	XI2::(PGK1p-MCRN-FBA1t-TEF1p-MCRC***-CYC1t), XI3::(TDH3p-xPK-ADH1t-TEF1p-PTA-PGK1t）,STB5p::ARTp,SUL1p::PGK1p,PTC7p::CWP2p,CIT1p::CIT2p-CIT1*,YHM2p::CWP2p ,IDP2p::CCW12p,FAS1p::HXT1p,POX1p::CCW12p, POX2p::PGK1p,gsf2Δ,ESBP6p::CWP2p,erf2Δ,pNLW7	This study
QLW52	XI2::(PGK1p-MCRN-FBA1t-TEF1p-MCRC***-CYC1t), XI3::(TDH3p-xPK-ADH1t-TEF1p-PTA-PGK1t）,STB5p::ARTp,SUL1p::PGK1p,PTC7p::CWP2p,CIT1p::CIT2p-CIT1*,YHM2p::CWP2p ,IDP2p::CCW12p,FAS1p::HXT1p,POX1p::CCW12p, POX2p::PGK1p,gsf2Δ,ESBP6p::CWP2p,sam2Δ,pNLW7	This study
QLW53	XI2::(PGK1p-MCRN-FBA1t-TEF1p-MCRC***-CYC1t), XI3::(TDH3p-xPK-ADH1t-TEF1p-PTA-PGK1t）,STB5p::ARTp,SUL1p::PGK1p,PTC7p::CWP2p,CIT1p::CIT2p-CIT1*,YHM2p::CWP2p ,IDP2p::CCW12p,FAS1p::HXT1p,POX1p::CCW12p, POX2p::PGK1p,gsf2Δ,ESBP6p::CWP2p,pNLW11	This study
QLW54	XI2::(PGK1p-MCRN-FBA1t-TEF1p-MCRC***-CYC1t), XI3::(TDH3p-xPK-ADH1t-TEF1p-PTA-PGK1t）,STB5p::ARTp,SUL1p::PGK1p,PTC7p::CWP2p,CIT1p::CIT2p-CIT1*,YHM2p::CWP2p ,IDP2p::CCW12p,FAS1p::HXT1p,POX1p::CCW12p, POX2p::PGK1p,gsf2Δ,ESBP6p::CWP2p,hxk2Δ,pNLW11	This study
QLW55	XI2::(PGK1p-MCRN-FBA1t-TEF1p-MCRC***-CYC1t), XI3::(TDH3p-xPK-ADH1t-TEF1p-PTA-PGK1t）,STB5p::ARTp,SUL1p::PGK1p,PTC7p::CWP2p,CIT1p::CIT2p-CIT1*,YHM2p::CWP2p ,IDP2p::CCW12p,FAS1p::HXT1p,POX1p::CCW12p, POX2p::PGK1p,gsf2Δ,ESBP6p::CWP2p,mth1Δ231,pNLW11	This study
QLW56	XI2::(PGK1p-MCRN-FBA1t-TEF1p-MCRC***-CYC1t), XI3::(TDH3p-xPK-ADH1t-TEF1p-PTA-PGK1t）,STB5p::ARTp,SUL1p::PGK1p,PTC7p::CWP2p,CIT1p::CIT2p-CIT1*,YHM2p::CWP2p ,IDP2p::CCW12p,FAS1p::HXT1p,POX1p::CCW12p, POX2p::PGK1p,gsf2Δ,ESBP6p::CWP2p,med2*,pNLW11	This study
QLW57	XI2::(PGK1p-MCRN-FBA1t-TEF1p-MCRC***-CYC1t), XI3::(TDH3p-xPK-ADH1t-TEF1p-PTA-PGK1t）,STB5p::ARTp,SUL1p::PGK1p,PTC7p::CWP2p,CIT1p::CIT2p-CIT1*,YHM2p::CWP2p ,IDP2p::CCW12p,FAS1p::HXT1p,POX1p::CCW12p, POX2p::PGK1p,gsf2Δ,ESBP6p::CWP2p,mth1Δ231,med2*,pNLW11	This study
QLW58	XI2::(PGK1p-MCRN-FBA1t-TEF1p-MCRC***-CYC1t), XI3::(TDH3p-xPK-ADH1t-TEF1p-PTA-PGK1t）,STB5p::ARTp,SUL1p::PGK1p,PTC7p::CWP2p,CIT1p::CIT2p-CIT1*,YHM2p::CWP2p ,IDP2p::CCW12p,FAS1p::HXT1p,POX1p::CCW12p, POX2p::PGK1p,gsf2Δ,ESBP6p::CWP2p,oca5Δ,pNLW11	This study
QLW59	XI2::(PGK1p-MCRN-FBA1t-TEF1p-MCRC***-CYC1t), XI3::(TDH3p-xPK-ADH1t-TEF1p-PTA-PGK1t）,STB5p::ARTp,SUL1p::PGK1p,PTC7p::CWP2p,CIT1p::CIT2p-CIT1*,YHM2p::CWP2p ,IDP2p::CCW12p,FAS1p::HXT1p,POX1p::CCW12p, POX2p::PGK1p,gsf2Δ,ESBP6p::CWP2p,oca3Δ,pNLW11	This study
QLW60	XI2::(PGK1p-MCRN-FBA1t-TEF1p-MCRC***-CYC1t), XI3::(TDH3p-xPK-ADH1t-TEF1p-PTA-PGK1t）,STB5p::ARTp,SUL1p::PGK1p,PTC7p::CWP2p,CIT1p::CIT2p-CIT1*,YHM2p::CWP2p ,IDP2p::CCW12p,FAS1p::HXT1p,POX1p::CCW12p, POX2p::PGK1p,gsf2Δ,ESBP6p::CWP2p,oca3Δ,oca5Δ,pNLW11	This study
QLW61	XI2::(PGK1p-MCRN-FBA1t-TEF1p-MCRC***-CYC1t), XI3::(TDH3p-xPK-ADH1t-TEF1p-PTA-PGK1t）,STB5p::ARTp,SUL1p::PGK1p,PTC7p::CWP2p,CIT1p::CIT2p-CIT1*,YHM2p::CWP2p ,IDP2p::CCW12p,FAS1p::HXT1p,POX1p::CCW12p, POX2p::PGK1p,gsf2Δ,ESBP6p::CWP2p,oca5Δ,KCS1p::TEF1p,pNLW11	This study
QLW62	XI2::(PGK1p-MCRN-FBA1t-TEF1p-MCRC***-CYC1t), XI3::(TDH3p-xPK-ADH1t-TEF1p-PTA-PGK1t）,STB5p::ARTp,SUL1p::PGK1p,PTC7p::CWP2p,CIT1p::CIT2p-CIT1*,YHM2p::CWP2p ,IDP2p::CCW12p,FAS1p::HXT1p,POX1p::CCW12p, POX2p::PGK1p,gsf2Δ,ESBP6p::CWP2p,oca5Δ,dld1Δ,pNLW11	This study
QLW63	XI2::(PGK1p-MCRN-FBA1t-TEF1p-MCRC***-CYC1t), XI3::(TDH3p-xPK-ADH1t-TEF1p-PTA-PGK1t）,STB5p::ARTp,SUL1p::PGK1p,PTC7p::CWP2p,CIT1p::CIT2p-CIT1*,YHM2p::CWP2p ,IDP2p::CCW12p,FAS1p::HXT1p,POX1p::CCW12p, POX2p::PGK1p,gsf2Δ,ESBP6p::CWP2p,oca5Δ,dld2Δ,pNLW11	This study
QLW64	XI2::(PGK1p-MCRN-FBA1t-TEF1p-MCRC***-CYC1t), XI3::(TDH3p-xPK-ADH1t-TEF1p-PTA-PGK1t）,STB5p::ARTp,SUL1p::PGK1p,PTC7p::CWP2p,CIT1p::CIT2p-CIT1*,YHM2p::CWP2p ,IDP2p::CCW12p,FAS1p::HXT1p,POX1p::CCW12p, POX2p::PGK1p,gsf2Δ,ESBP6p::CWP2p,oca5Δ,dld3Δ,pNLW11	This study
QLW65	XI2::(PGK1p-MCRN-FBA1t-TEF1p-MCRC***-CYC1t), XI3::(TDH3p-xPK-ADH1t-TEF1p-PTA-PGK1t）,STB5p::ARTp,SUL1p::PGK1p,PTC7p::CWP2p,CIT1p::CIT2p-CIT1*,YHM2p::CWP2p ,IDP2p::CCW12p,FAS1p::HXT1p,POX1p::CCW12p, POX2p::PGK1p,gsf2Δ,ESBP6p::CWP2p,oca5Δ,uga1Δ,pNLW11	This study
QLW66	XI2::(PGK1p-MCRN-FBA1t-TEF1p-MCRC***-CYC1t), XI3::(TDH3p-xPK-ADH1t-TEF1p-PTA-PGK1t）,STB5p::ARTp,SUL1p::PGK1p,PTC7p::CWP2p,CIT1p::CIT2p-CIT1*,YHM2p::CWP2p ,IDP2p::CCW12p,FAS1p::HXT1p,POX1p::CCW12p, POX2p::PGK1p,gsf2Δ,ESBP6p::CWP2p,oca5Δ,alt1Δ,pNLW11	This study
QLW67	XI2::(PGK1p-MCRN-FBA1t-TEF1p-MCRC***-CYC1t), XI3::(TDH3p-xPK-ADH1t-TEF1p-PTA-PGK1t）,STB5p::ARTp,SUL1p::PGK1p,PTC7p::CWP2p,CIT1p::CIT2p-CIT1*,YHM2p::CWP2p ,IDP2p::CCW12p,FAS1p::HXT1p,POX1p::CCW12p, POX2p::PGK1p,gsf2Δ,ESBP6p::CWP2p,oca5Δ,alt2Δ,pNLW11	This study
QLW68	XI2::(PGK1p-MCRN-FBA1t-TEF1p-MCRC***-CYC1t), XI3::(TDH3p-xPK-ADH1t-TEF1p-PTA-PGK1t）,STB5p::ARTp,SUL1p::PGK1p,PTC7p::CWP2p,CIT1p::CIT2p-CIT1*,YHM2p::CWP2p ,IDP2p::CCW12p,FAS1p::HXT1p,POX1p::CCW12p, POX2p::PGK1p,gsf2Δ,ESBP6p::CWP2p,oca5Δ,uga2Δ,pNLW11	This study
QLW69	XI2::(PGK1p-MCRN-FBA1t-TEF1p-MCRC***-CYC1t), XI3::(TDH3p-xPK-ADH1t-TEF1p-PTA-PGK1t）,STB5p::ARTp,SUL1p::PGK1p,PTC7p::CWP2p,CIT1p::CIT2p-CIT1*,YHM2p::CWP2p ,IDP2p::CCW12p,FAS1p::HXT1p,POX1p::CCW12p, POX2p::PGK1p,gsf2Δ,ESBP6p::CWP2p,oca5Δ,pNLW12	This study
QLW70	XI2::(PGK1p-MCRN-FBA1t-TEF1p-MCRC***-CYC1t), XI3::(TDH3p-xPK-ADH1t-TEF1p-PTA-PGK1t）,STB5p::ARTp,SUL1p::PGK1p,PTC7p::CWP2p,CIT1p::CIT2p-CIT1*,YHM2p::CWP2p ,IDP2p::CCW12p,FAS1p::HXT1p,POX1p::CCW12p, POX2p::PGK1p,gsf2Δ,ESBP6p::CWP2p,oca5Δ,pNLW13	This study
QLW71	XI2::(PGK1p-MCRN-FBA1t-TEF1p-MCRC***-CYC1t), XI3::(TDH3p-xPK-ADH1t-TEF1p-PTA-PGK1t）,STB5p::ARTp,SUL1p::PGK1p,PTC7p::CWP2p,CIT1p::CIT2p-CIT1*,YHM2p::CWP2p ,IDP2p::CCW12p,FAS1p::HXT1p,POX1p::CCW12p, POX2p::PGK1p,gsf2Δ,ESBP6p::CWP2p,oca5Δ,uga1Δ,pNLW12	This study

## Sheet: plasmid 
	Plasmid	Description	Resource
	pNLW1	pUGG(2μ ori-shortp-URA3)-TEF1p-MCRC-CYC1t	This study
	pNLW2	pUGG(2μ ori-shortp-URA3)-TEF1p-MCRCN941V K1107W S1115R-CYC1t	This study
	pNLW3	pUGG(2μ ori-shortp-URA3)-PGK1p-MCRNSDR1+2-FBA1t-TEF1p-MCRC-CYC1t	This study
	pNLW4	pUGG(2μ ori-shortp-URA3)-PGK1p-MCRNSDR1+2-FBA1t-TEF1p-MCRCN941V K1107W S1115R-CYC1t	This study
	pNLW5	pUGG(2μ ori-shortp-URA3)-PGK1p-MCRNSDR1-FBA1t-TEF1p-MCRCN941V K1107W S1115R-CYC1t	This study
	pNLW6	pUGG(2μ ori-shortp-URA3)-PGK1p-ORA1-FBA1t-TEF1p-MCRCN941V K1107W S1115R-CYC1t	This study
	pNLW7	pUGG(2μ ori-shortp-URA3)-PGK1p-YDFG-FBA1t-TEF1p-MCRCN941V K1107W S1115R-CYC1t	This study
	pNLW8	pUGG(2μ ori-shortp-URA3)-TDH3p-YDFG(codon)-FBA1t-TEF1p-MCRCN941V K1107W S1115R-CYC1t	This study
	pNLW9	pUGG(2μ ori-shortp-URA3)-PGK1p-YDFG-linker-MCRCN941V K1107W S1115R-CYC1t	This study
	pNLW10	pUGG(2μ ori-shortp-URA3)-PGK1p-MCRNSDR1-linker1-YDFG-linker2-MCRCN941V K1107W S1115R-CYC1t	This study
	pNLW11	pUGG(2μ ori-shortp-HIS3)-PGK1p-YDFG-FBA1t-TEF1p-MCRCN941V K1107W S1115R-CYC1t	This study
	pNLW12	pUGG(2μ ori-shortp-HIS3)-PGK1p-YDFG-FBA1t-CCW12p-MCRCN941V K1107W S1115R-CYC1t	This study
	pNLW13	pUGG(2μ ori-shortp-HIS3)-PGK1p-YDFG-FBA1t-TDH3p-MCRCN941V K1107W S1115R-CYC1t	This study
