# Supplementary material for: Increased CO2 Fixation Enables High Carbon-Yield Production of the Acrylic Acid Precursor 3-Hydroxypropionic Acid in Yeast
Source: Research Square preprint supplement (doi:10.21203/rs.3.rs-3278694/v1), 2023-09-15
Supplement: Supplementary file 2 [file 685abdac39962b9033776465.xlsx]

## Sheet: Sheet1
Metabolite Acronym	Metabolite Full name
1,3-BPG	3-phospho-D-glyceroyl-phosphate
2PG	2－phosphoglycerate
3PG	3－phosphoglycerate
6PG	6-phosphogluconate
6PGL	6-Gluconolactone
Acald	acetaldehyde
AcCoA	Acetyl coenzyme A
ACE	Acetate
AcP	acetyl phosphate
CIT	Citric Acid
DHAP	dihydroxyacetone phosphate
E4P	erythrose-4-phosphate
F6P	fructose-6-phosphate
FBP	fructose-1,6-bisphosphate
FUM	fumaric acid
G6P	glucose-6-phosphate
GAP	glyceraldehyde-3-phosphate
GLX	Glyoxylic acid
GP3P	glycerol 3-phosphate
ICIT	isocitric acid
KDPG	2-keto-3-deoxy-6-phosphogluconate
MAL	malic acid
Mal-CoA	malonyl coenzyme A
MSA	malonate semialdehyde
OAA	Oxaloacetic acid
PEP	Phosphoenolpyruvate
PYR	Pyruvate
R5P	ribose-5-phosphate
Ru5P	ribulose-5-phosphate
S7P	sedoheptulose-7-phosphate
SUC	Succinic Acid
SUC-CoA	succinyl coenzyme A
X5P	xylulose-5-phosphate
α-KG	α-Ketoglutaric acid

## Sheet: Sheet2
Gene	Encoding enzyme
ACC1	acetyl-CoA carboxylase
ALT1	Alanine transaminase
ALT2	Catalytically inactive alanine transaminase
BOR1	Boron efflux transporter
CIT1	Mitochondrial citrate synthase
CIT2	Citrate synthase
CPA1	Small subunit of carbamoyl phosphate synthetase
CPA2	Large subunit of carbamoyl phosphate synthetase
DLD1	Major mitochondrial D-lactate dehydrogenase
DLD2	D-2-hydroxyglutarate dehydrogenase
DLD3	2-hydroxyglutarate transhydrogenase
ERF2	Subunit of a palmitoyltransferase
ESBP6	Protein with similarity to monocarboxylate permeases
FAS1	Beta subunit of fatty acid synthetase
GPD1	NAD-dependent glycerol-3-phosphate dehydrogenase
GPD2	NAD-dependent glycerol 3-phosphate dehydrogenase
GSF2	Endoplasmic reticulum (ER) localized integral membrane protein
GUT2	Mitochondrial glycerol-3-phosphate dehydrogenase
HXK2	Hexokinase isoenzyme 2
IDP2	Cytosolic NADP-specific isocitrate dehydrogenase
JEN1	Monocarboxylate/proton symporter of the plasma membrane
KCS1	Inositol hexakisphosphate and inositol heptakisphosphate kinase
MED2	Subunit of the RNA polymerase II mediator complex
MTH1	Negative regulator of the glucose-sensing signal transduction pathway
NCE103	Carbonic anhydrase
NDE1	Mitochondrial external NADH dehydrogenase
NDE2	Mitochondrial external NADH dehydrogenase
OCA3	Inositol phosphatase involved in inositol pyrophosphate metabolism
OCA5	Inositol phosphatase involved in inositol pyrophosphate metabolism
ORA1	NADP(+)-dependent serine dehydrogenase and carbonyl reductase
PDR12	Plasma membrane ATP-binding cassette (ABC) transporter
PGI1	glucose-6-phosphate isomerase
PMA1	Plasma membrane P2-type H+-ATPase
POX1	Fatty-acyl coenzyme A oxidase
POX2	3-hydroxyacyl-CoA dehydrogenase and enoyl-CoA hydratase
PTA	phosphotransacetylase
PTC6	Mitochondrial type 2C protein phosphatase
PTC7	Type 2C serine/threonine protein phosphatase
SAM2	S-adenosylmethionine synthetase
SFA1	Bifunctional alcohol dehydrogenase and formaldehyde dehydrogenase
SSB1	Cytoplasmic ATPase that is a ribosome-associated molecular chaperone
STB5	Transcription factor
SUL1	Sulfate transporters
SUL2	Sulfate transporters
SUR1	Mannosylinositol phosphorylceramide (MIPC) synthase catalytic subunit
TRK1	Component of the Trk1p-Trk2p potassium transport system
UGA1	Gamma-aminobutyrate (GABA) transaminase
UGA2	Succinate semialdehyde dehydrogenase
xPK	xylulose-5-phosphate specific phosphoketolase
POT1	3-ketoacyl-CoA thiolase with broad chain length specificity
YHM2	Citrate and oxoglutarate carrier protein
