# Supplementary material for: Increased CO2 Fixation Enables High Carbon-Yield Production of the Acrylic Acid Precursor 3-Hydroxypropionic Acid in Yeast
Source: Research Square preprint supplement (doi:10.21203/rs.3.rs-3278694/v1), 2023-09-15
Supplement: Supplementary file 3 [file 9959da289bb5ed7a6fb54170.xlsx]

## Sheet: DNA fragment sequence
	Sequence (5’-3’)
PGK1p	GGAAGTACCTTCAAAGAATGGGGTCTTATCTTGTTTTGCAAGTACCACTGAGCAGGATAATAATAGAAATGATAATATACTATAGTAGAGATAACGTCGATGACTTCCCATACTGTAATTGCTTTTAGTTGTGTATTTTTAGTGTGCAAGTTTCTGTAAATCGATTAATTTTTTTTTCTTTCCTCTTTTTATTAACCTTAATTTTTATTTTAGATTCCTGACTTCAACTCAAGACGCACAGATATTATAACATCTGCATAATAGGCATTTGCAAGAATTACTCGTGAGTAAGGAAAGAGTGAGGAACTATCGCATACCTGCATTTAAAGATGCCGATTTGGGCGCGAATCCTTTATTTTGGCTTCACCCTCATACTATTATCAGGGCCAGAAAAAGGAA…
TEF1p	CATAGCTTCAAAATGTTTCTACTCCTTTTTTACTCTTCCAGATTTTCTCGGACTCCGCGCATCGCCGTACCACTTCAAAACACCCAAGCACAGCATACTAAATTTCCCCTCTTTCTTCCTCTAGGGTGTCGTTAATTACCCGTACTAAAGGTTTGGAAAAGAAAAAAGAGACCGCCTCGTTTCTTTTTCTTCGTCGAAAAAGGCAATAAAAATTTTTATCACGTTTCTTTTTCTTGAAAATTTTTTTTTTTGATTTTTTTCTCTTTCGATGACCTCCCATTGATATTTAAGTTAATAAACGGTCTTCAATTTCTCAAGTTTCAGTTTCATTTTTCTTGTTCTATTACAACTTTTTTTACTTCTTGCTCATTAGAAAGAAAGCATAGCAATCTAATCTAA…
ARTp	AATCTAATCTAAGTTTTAATTACAAA
TDH3p	TCATTATCAATACTGCCATTTCAAAGAATACGTAAATAATTAATAGTAGTGATTTTCCTAACTTTATTTAGTCAAAAAATTAGCCTTTTAATTCTGCTGTAACCCGTACATGCCCAAAATAGGGGGCGGGTTACACAGAATATATAACATCGTAGGTGTCTGGGTGAACAGTTTATTCCTGGCATCCACTAAATATAATGGAGCCCGCTTTTTAAGCTGGCATCCAGAAAAAAAAAGAATCCCAGCACCAAAATATTGTTTTCTTCACCAACCATCAGTTCATAGGTCCATTCTCTTAGCGCAACTACAGAGAACAGGGGCACAAACAGGCAAAAAACGGGCACAACCTCAATGGAGTGATGCAACCTGCCTGGAGTAAATGATGACACAAGGCAATTG…
FBA1P	ATAATGATAATGACAGCAGGATTATCGTAATACGTAATAGTTGAAAATCTCAAAAATGTGTGGGTCATTACGTAAATAATGATAGGAATGGGATTCTTCTATTTTTCCTTTTTCCATTCTAGCAGCCGTCGGGAAAACGTGGCATCCTCTCTTTCGGGCTCAATTGGAGTCACGCTGCCGTGAGCATCCTCTCTTTCCATATCTAACAACTGAGCACGTAACCAATGGAAAAGCATGAGCTTAGCGTTGCTCCAAAAAAGTATTGGATGGTTAATACCATTTGTCTGTTCTCTTCTGACTTTGACTCCTCAAAAAAAAAAAATCTACAATCAACAGATCGCTTCAATTACGCCCTCACAAAAACTTTTTTCCTTCTTCTTCGCCCACGTTAAATTTTAT…
CIT2p	GACCAATGTTAATGAAAACTTGAACTGCTGAAGTGTGATATTCAATGTATGAGATAATCCATTAAATCATCTACAGTTTAAAGACTGTAGGCTTACATGACCGTTTATCACTGCGATATTGGAGGAAGCGCTTCGGATCAATGGACCTTTTACTTAGCAGAGCGAAGGCTGAAAATCATGAACCCCAACAGCATGTGTGACCTCTCTTCTCACGCCTGGCAAGAAACCAAACTACGGCATACATTCAGCGCACCAAAAAGGAACTCCGTACTATTTACATTAAAAACAAGAAAATGTGTTGCCATTTCCGTAAAATGAATGGCCCATGTTCATACGCGTATGCAACCGTCTTATTTACACTCCGACTAATGTCCTTCTAATTACTGTGGAAGACGGCCG…
CWP2p	GCAACCTATGCAGAAGATTGCTTTTCCCACGCCTGTTTTACGTCTCCAGGGCACTTGAAACAATGCAGCGATCGCCGCCACAACACGCCAAAGAGAAGCGAAAGTGGGCCTGGGCGGCCTCAGTTTCGGCAGAGGTAAACAACACGAACTGAACTGCCTTAGCTCCGAAGGGCAATTCCACAGGCACTCCGCGGGGCCCGGCCAAGGCCCAAAAGGCGTGGAATATGCGCGTTTTGGGGCCATAACACCCAGTACCACGGCCGGAACGGGCCATATAATAAGTTTTTCACTCTCAAGAATGGTAAACGTAAATAGGAACATCCCACTACCCTAGAAATTGCGGAAATTTCGCGCTTATCATTAGAAAATCTGGAACCGTCCTTTTTCCTCTTTCTTGCA…
CCW12p	AACCAGGGCAAAGCAAAATAAAAGAAACTTAATACGTTATGCCGTAATGAAGGGCTACCAAAAACGATAATCTCAACTGTAAACAGGTACAATGCGGACCCTTTTGCCACAAAACATACATCATTCATTGCCGGAAAAAGAAAGAAGTGAAGACAGCAGTGCAGCCAGCCATGTTGCGCCAATCTAATTATAGATGCTGGTGCCCTGAGGATGTATCTGGAGCCAGCCATGGCATCATGCGCTACCGCCGGATGTAAAATCCGACACGCAAAAGAAAACCTTCGAGGTTGCGCACTTCGCCCACCCATGAACCACACGGTTAGTCCAAAAGGGGCAGTTCAGATTCCAGATGCGGGAATTAGCTTGCTGCCACCCTCACCTCACTAACGCTGCGGTGTG…
HXT1p	CAATTGTAGGTCCTAAATTCAAGGCGGATGTAAGGAGTATTGGTTTCGAAAGTTTTTCCGAAGCGGCATGGCAGGGACTACTTGCGCATGCGCTCGGATTATCTTCATTTTTGCTTGCAAAAACGTAGAATCATGGTAAATTACATGAAGAATTCTCTTTTTTTTTTTTTTTTTTTTTTTTTTACCTCTAAAGAGTGTTGACCAACTGAAAAAACCCTTCTTCAAGAGAGTTAAACTAAGACTAACCATCATAACTTCCAAGGAATTAATCGATATCTTGCACTCCTGATTTTTCTTCAAAGAGACAGCGCAAAGGATTATGACACTGTTGCATTGAGTCAAAAGTTTTTCCGAAGTGACCCAGTGCTCTTTTTTTTTTTCCGTGAAGGACTGACAAAT…
RPL3p	TGTCTGCTGCCATTACGTACAGGTAGGCAAAGGCAAACAAGAATAGCACTTTTTCACTTGCTGCTTTTTTTTGTGAATGAAGTTTATCGTATATTCTGTTAGTGCCGCTCGTATCAGCCACTTACGTTATCATTCTAAAGTAAGTATACGAAATGTGCAAACCTTAGTAGACGTTCAAGAATTGCTCGATAATTGCGAACAAACCAGCTGCTAAGCCGGGAAGTTAAGTCCTCAACACAGAAATGATGCAAACAATTTATTAAATTCAGTGGTAATGCAACAGCAAGAGGAAAGGTGGAGGGATTAACGCATTTCAGACAGCTTTATAGGGGGAAAGAAAGCACTCGCAAACTTGCTGCCTGTTCGCAGTCATTGGTTGCAAAAACTAAACTCTACTCA…
COX9p	TGGGCGATCTTCCTTGTGCGTCTGTTGTCTCACAATTGCTTGAAGGAAGATTTCATAAGATCATATGAGTCCCTCTTTATATGGGCAAGTGGAATTATGTGAGTCAAAATCCGCGCGTGACCCGTAAAGCGTTATCAGAAGGTGCAAACGGTGCTATTTAGCTCATAAAAGGAATGATTCAAGCTCTTTTGGATTGTAAGACACCTTTATTTAGTCCAAGATCATTGCAGACCCTTGTTATGGTCTTTAGCAGAGTCCTCCTCTATATCTCTTCATTTACTGCAACCTGATTGGCCCGCTACCACGATGCCCGCTTTGTTCCTGTGGTATTAAAAGAATCGATGAAAGAGACTCTTATCTTCAGGGAAAATTAGGACCGAGAATTAGAGCAAGCAAGAT…
ADH1t	GCGAATTTCTTATGATTTATGATTTTTATTATTAAATAAGTTATAAAAAAAATAAGTGTATACAAATTTTAAAGTGACTCTTAGGTTTTAAAACGAAAATTCTTATTCTTGAGTAACTCTTTCCTGTAGGTCAGGTTGCTTTCTCAGGTATAGCATGAGGTCGCTCTTATTGACCACACCTCTACCGG
PGK1t	ATTGAATTGAATTGAAATCGATAGATCAATTTTTTTCTTTTCTCTTTCCCCATCCTTTACGCTAAAATAATAGTTTATTTTATTTTTTGAATATTTTTTATTTATATACGTATATATAGACTATTATTTATCTTTTAATGATTATTAAGATTTTTATTAAAAAAAAATTCGCTCCTCTTTTAATGCCTTTATGCAGTTTTTTTTTCCCATTCGATATTTCTATGTTCGGGTTCAGCGTATTTTAAGTTTAATAACTCGAAAATTCTGCGTT
FBA1t	GTTAATTCAAATTAATTGATATAGTTTTTTAATGAGTATTGAATCTGTTTAGAAATAATGGAATATTATTTTTATTTATTTATTTATATTATTGGTCGGCTCTTTTCTTCTGAAGGTCAATGACAAAATGATATGAAGGAAATAATGATTTCTAAAATTTTACAACGTAAGATATTTTTACAAAAGCCTAGCTCATCTTTTGTCATGCACTATTTTACTCACGCTTGAAATTAACGGCCAGTCCACTGCGGAGTCATTTCAAAGTCATCCTAATCGATCTATCGTTTTTGATAGCTCATTTTGGAGTTCGCGATTGTCTTCTGTTATTCACAACTGTTTTAATTTTTATTTCATTCTGGAACTCTTCGAGTTCTTTGTAAAGTCTTTCATAGTAGCTTA…
CYC1t	ATCCGCTCTAACCGAAAAGGAAGGAGTTAGACAACCTGAAGTCTAGGTCCCTATTTATTTTTTTATAGTTATGTTAGTATTAAGAACGTTATTTATATTTCAAATTTTTCTTTTTTTTCTGTACAGACGCGTGTACGCATGTAACATTATACTGAAAACCTTGCTTGAGAAGGTTTTGGGACGCTCGAAG
Linker1	GGTTCTGCTGGTTCTGCTGCTGGTTCTGGTGAATTT
Linker2	GGAGGTGGAGGTTCTGGTGGAGGTGGTTCAGGTGGTGGAGGTTCAGGTGGTGGAGGTTCT
YDFG	ATGATCGTTTTAGTAACTGGAGCAACGGCAGGTTTTGGTGAATGCATTACTCGTCGTTTTATTCAACAAGGGCATAAAGTTATCGCCACTGGCCGTCGCCAGGAACGGTTGCAGGAGTTAAAAGACGAACTGGGAGATAATCTGTATATCGCCCAACTGGACGTTCGCAACCGCGCCGCTATTGAAGAGATGCTGGCATCGCTTCCTGCCGAGTGGTGCAATATTGATATCCTGGTAAATAATGCCGGCCTGGCGTTGGGCATGGAGCCTGCGCATAAAGCCAGCGTTGAAGACTGGGAAACGATGATTGATACCAACAACAAAGGCCTGGTATATATGACGCGCGCCGTCTTACCGGGTATGGTTGAACGTAATCATGGTCATATTATTAACATTGGC…
XPK	ATGGCTGATTTCGACTCAAAGGAATACTTAGAATTGGTTGATAAATGGTGGAGAGCTACTAACTACTTGTCCGCTGGTATGATCTTCTTGAAGTCAAACCCATTATTTTCCGTTACTAACACACCTATCAAGGCTGAAGATGTTAAAGTCAAGCCAATTGGTCATTGGGGTACTATATCTGGTCAAACATTCTTGTATGCTCACGCAAACAGATTGATTAACAAATACGGTTTGAATATGTTTTACGTTGGTGGTCCAGGTCATGGTGGTCAAGTAATGGTTACAAACGCTTACTTGGATGGTGCATATACCGAAGACTACCCTGAAATTACTCAAGATATCGAGGGTATGAGTCATTTGTTTAAAAGATTCTCTTTCCCAGGTGGTATTGGTTCACAT…
PTA	ATGAAGCTAATGGAAAACATCTTCGGGCTGGCCAAGGCGGACAAAAAAAAGATCGTGTTGGCGGAAGGCGAAGAGGAGCGTAACATTAGGGCTTCCGAGGAAATAATCAGAGACGGGATAGCCGATATAATCCTAGTTGGCTCAGAATCAGTCATTAAGGAAAATGCCGCTAAATTTGGCGTGAATCTGGCAGGGGTCGAGATAGTCGATCCAGAAACGTCCTCCAAGACTGCCGGCTACGCGAACGCTTTCTATGAGATCCGTAAAAATAAGGGTGTCACACTAGAAAAAGCGGATAAAATAGTCCGTGATCCAATTTATTTTGCCACCATGATGGTCAAACTAGGTGATGCTGATGGGCTAGTGTCTGGAGCCATTCACACAACGGGTGATTTACTA…
YDFGcodon	ATGATCGTTTTGGTTACTGGTGCTACTGCTGGTTTCGGTGAATGTATCACTAGAAGATTCATCCAACAAGGTCACAAGGTTATCGCTACTGGTAGAAGACAAGAAAGATTGCAAGAATTGAAGGACGAATTGGGTGACAACTTGTACATCGCTCAATTGGACGTTAGAAACAGAGCTGCTATCGAAGAAATGTTGGCTTCTTTGCCAGCTGAATGGTGTAACATCGACATCTTGGTTAACAACGCTGGTTTGGCTTTGGGTATGGAACCAGCTCACAAGGCTTCTGTTGAAGACTGGGAAACTATGATCGACACTAACAACAAGGGTTTGGTTTACATGACTAGAGCTGTTTTGCCAGGTATGGTTGAAAGAAACCACGGTCACATCATCAACATCGGT…
