# Supplementary material for: Increased CO2 Fixation Enables High Carbon-Yield Production of the Acrylic Acid Precursor 3-Hydroxypropionic Acid in Yeast
Source: Research Square preprint supplement (doi:10.21203/rs.3.rs-3278694/v1), 2023-09-15
Supplement: Supplementary file 4 [file e831b5bb49fd3c735fc08109.docx]

**Increased CO2 Fixation Enables High Carbon-Yield Production of** **the Acrylic Acid Precursor 3-Hydroxypropionic Acid in Yeast**

Ning Qin1, 9, Lingyun Li1, 2, 9, Xiaozhen Wan1, Xu Ji1, Yu Chen3, Chaokun Li4, Ping Liu5, Yijie Zhang1, Weijie Yang1, Junfeng Jiang6, Jianye Xia6, Shuobo Shi1, Tianwei Tan1, Jens Nielsen1, 2, 7, *, Yun Chen2, *, and Zihe Liu1, 8, *

1College of Life Science and Technology, Beijing Advanced Innovation Center for Soft Matter Science and Engineering, Beijing University of Chemical Technology, 100029 Beijing, China;

2Department of Biology and Biological Engineering, Chalmers University of Technology, SE412 96 Gothenburg, Sweden;

3CAS Key Laboratory of Quantitative Engineering Biology, Shenzhen Institute of Synthetic Biology, Shenzhen Institute of Advanced Technology, Chinese Academy of Sciences, Shenzhen 518055, China;

4Stem Cells and Metabolism Research Program, Faculty of Medicine, University of Helsinki, 00014 Helsinki, Finland;

5The State Key Laboratory of Chemical Resource Engineering, College of Chemical Engineering, Beijing University of Chemical Technology, 100029 Beijing, China;

6Tianjin Institute of Industrial Biotechnology, Chinese Academy of Sciences, Tianjin, 300308, China;

7BioInnovation Institute, Ole Maaløes Vej 3, DK2200 Copenhagen N, Denmark

8Lead contact

9These authors contributed equally: Ning Qin, Lingyun Li

***Correspondence: nielsenj@chalmers.se, yunc@chalmers.se, and** [**zihe@mail.buct.edu.cn**](mailto:zihe@mail.buct.edu.cn)


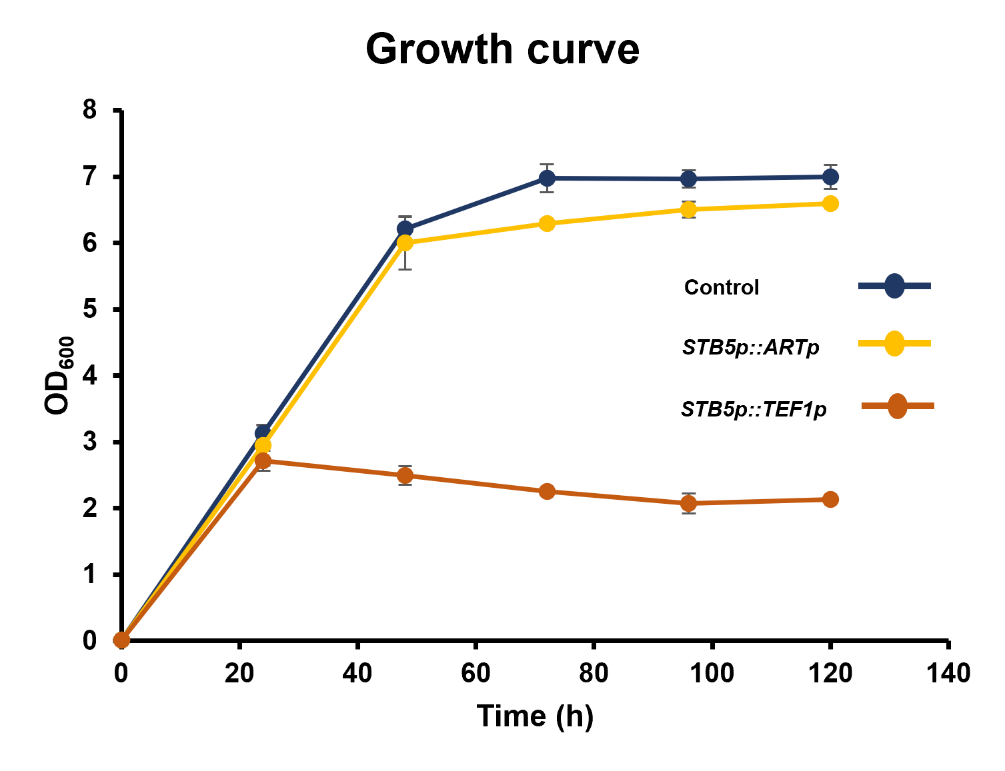


**Figure S1, Growth profiling of the WT strain, *ART*p-*STB5* strain, and *TEF1*p-*STB5* strain.** The control strain was QLW3, the *STB5p::TEF1p* strain was QLW4, and *STB5p::ARTp* strain was QLW5. The genotype was listed in Table S2. All data were presented as mean ± SD of biological triplicates.


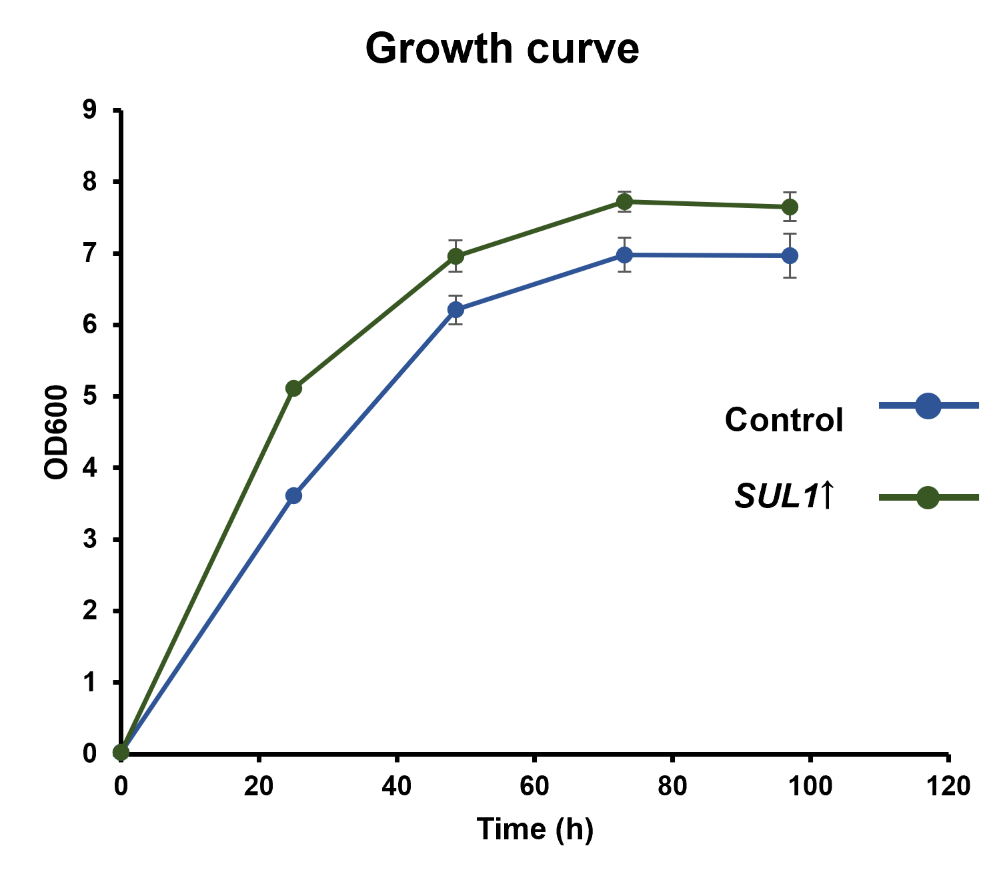


**Figure S2, Overexpression of *SUL1* contributed to the improved strain growth.** The control strain was QLW3, the *SUL1* overexpression strain was QLW8. The genotype was listed in Table S2. All data were presented as mean ± SD of biological triplicates.


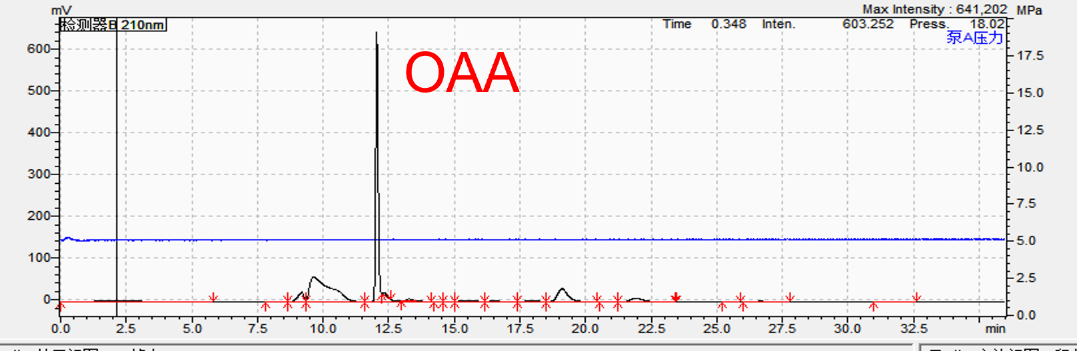


**Figure S3, Oxaloacetate (OAA) accumulation was observed after co-overexpression of *STB5* and *SUL1*.** Around 10.8 minutes, there is a high accumulation peak of the oxaloacetate (OAA), the oxaloacetate (OAA) detection method refer to the materials and methods section.


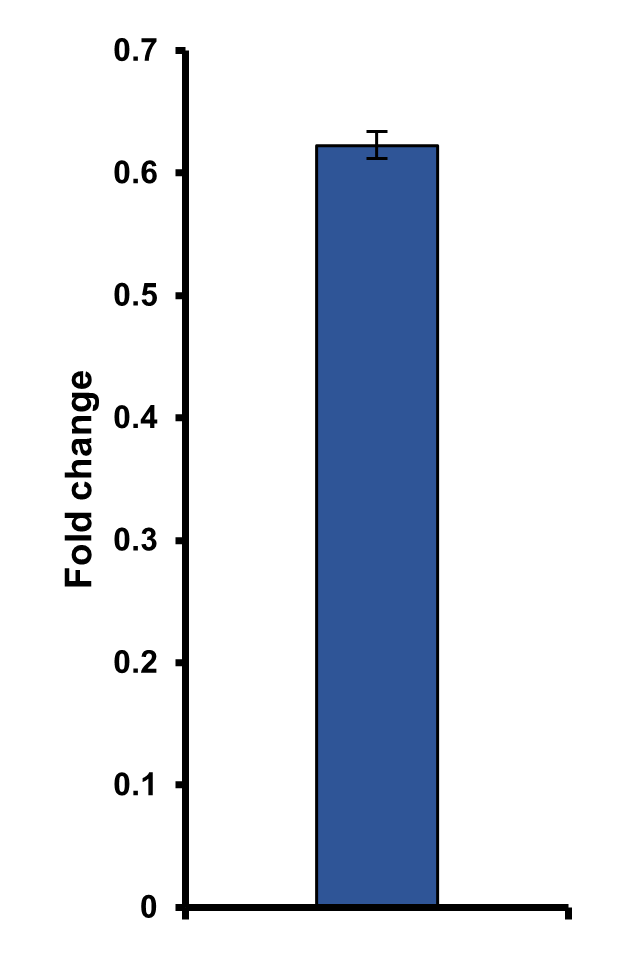


**Figure S4, The expression level of *HIS3* marker plasmid relative to *URA3* marker plasmid.**

The expression level of the *HIS3* marker is approximately 0.62 times that of the *URA3* marker. Abbreviations were defined in Table S1. All data were presented as mean ± SD of biological triplicates.
